# **Positive and negative determinants of normal linear growth among pre-school children living in better-off households: an analysis of secondary data from sub-Saharan Africa**

Dickson A. Amugsi<sup>1\*</sup>, Zacharie T. Dimbuene<sup>2,3</sup>, Elizabeth W. Kimani-Murage<sup>1</sup>

1. Maternal and Child Wellbeing Unit, Research Division, African Population and Health Research Center, Nairobi, Kenya

2. Department of Population Sciences and Development, University of Kinshasa, Democratic Republic of the Congo

3. Microdata Access Division, Statistics Canada, Ottawa, Canada

\* Corresponding author

Email: [damugsi2002@yahoo.com](mailto:damugsi2002@yahoo.com); [damugsi@aphrc.org](mailto:damugsi@aphrc.org) (DAA)

# **Abstract**

This study examined the positive and negative determinants of normal linear growth among pre-school children living in better-off households, using survey data from Ghana, Kenya, Nigeria, Mozambique and Democratic Republic of Congo (DRC). The main outcome variable was child height-for-age z-scores (HAZ), categorized into  $HAZ \geq -2SD$  (normal growth/not stunted) and  $HAZ < -2$  (stunted). Logistic regression was utilized in the analysis. We estimated adjusted odd ratios (aORs) of the determinants of normal growth. Higher maternal weight (measured by body mass index) was associated with increased odds of normal growth in Mozambique, DRC, Kenya and Nigeria. A unit increase in maternal years of education was associated with increased odds in normal growth in DRC (aOR=1.06, 95% CI=1.03, 1.09), Ghana (aOR=1.08, 95% CI=1.04, 1.12), Mozambique (aOR=1.08, 95% CI=1.05, 1.11) and Nigeria (aOR=1.07, 95% CI=1.06, 1.08). A year increase in maternal age was associated positively with normal growth in all the five countries. Breastfeeding was associated with increased odds of normal growth in Nigeria (aOR= 1.30, 95% CI=1.16, 1.46) and Kenya (aOR=1.37, 95% CI=1.05, 1.79). Children of mothers who were working had 25% (aOR=0.75, 95% CI=0.60, 0.93) reduced odds of normal growth in DRC. A unit change in maternal parity was associated with 10% (aOR=0.90, 95% CI=0.84, 0.97), 23% (aOR=0.77, 95% CI=0.63, 0.93), 25% (aOR=0.75, 95% CI=0.69, 0.82), 6% (aOR=0.94, 95% CI=0.89, 0.99) and 5% (aOR=0.95, 95% CI=0.92, 0.99) reduced odds of normal growth in DRC, Ghana, Kenya, Mozambique and Nigeria respectively. A child being a male was associated with 16% (aOR=0.82, 95% CI=0.68, 0.98), 40% (aOR=0.60, 95% CI=0.40, 0.89), 37% (aOR=0.63, 95% CI=0.51, 0.77) and 21% (aOR=0.79, 95% CI=0.71, 0.87) reduced odds of normal child growth in DRC, Ghana, Kenya and Nigeria respectively. In conclusion, maternal education, weight, age, breastfeeding and

antenatal care are positive determinants of normal child growth, while maternal parity, employment, and child sex and age are negative determinants. Interventions to promote child growth should take into account these differential effects.

**Key words:** Normal growth, stunting, factors, sub-Saharan Africa, rich households

# **Introduction**

Child health is a fundamental public health issue, for children's sake and because good child health sets one up for life-long health and functioning, and well-being. In sub-Saharan Africa (SSA), child physical health is of particular concern due to the high rates of illness and mortality in the region. Child normal growth, defined in this paper as children who are not stunted (short stature for age), is a foundation for optimal child health and wellbeing. This is because normal child growth is associated positively with cognitive development, higher school achievements, lower morbidity and mortality, higher economic productivity in adulthood and better maternal reproductive outcomes (1-3). This suggests the need for strong investment in nutrition interventions to promote child growth so as to ensure life-long benefits. Working with international partners such as WHO and UNICEF, governments of SSA have put in place various interventions to promote child growth by addressing stunting in the region (4, 5). However, the implementation of these programmes more often than not places more emphasis on child growth deficiencies and how to protect children against the risk factors contributing to these deficiencies (6, 7). This may make it difficult to directly attribute the effects of the programmes on child normal growth outcomes, except to infer that reduction in stunting implies increase in normal growth. The present study intends to fill this gap by providing robust evidence on the positive as well as negative determinants of normal growth among children living in better-off households. Indeed, many experts have called for this type of resource focused approach in promoting child health outcomes, as exemplified by the UNICEF childcare framework (8, 9).

85 There are a number of factors that affect child linear growth in low and middle incomes countries  
86 (LMICs). These factors include maternal education, employment, household wealth index,  
87 antenatal care (ANC), parity, maternal body mass index (BMI), urban place of residence,  
88 breastfeeding, and maternal age among others. These factors affect child linear growth either  
89 negatively or positively. There is substantial evidence that improvement in maternal education is  
90 associated positively with child linear growth in many settings (10-14). Children whose mothers  
91 are educated tend to have better nutritional status compared to children of mothers with no  
92 education. Studies that examine the effect of maternal BMI have also elucidated the strong  
93 positive association between maternal BMI and child growth (10, 11, 14-17). A study in Ethiopia  
94 showed that maternal BMI was associated positively with children nutritional status (17).  
95 Similarly, maternal age and parity are important factors that affect child growth. Fenske and  
96 colleagues (11) observed that maternal age has significant effect on childhood stunting. Two  
97 other studies established the relationship between maternal age and child nutritional status (18,  
98 19). In India, undernourishment was more prevalent in children of 26-30 year age group mothers  
99 than the other extremes of reproductive ages (18). Relatedly, mothers in their early 20s tend to  
100 have children with poorer health outcomes, including nutrition, while children of older mothers  
101 tend to suffer less from stunting (19, 20). Although, there is a paucity of literature on the effects  
102 of maternal parity on child nutritional status, some few studies have observed negative effects  
103 of parity on child growth (21-23). Further, Kuhnt and Vollmer (24) found in their study that having  
104 at least four ANC visits is associated with reduced odds of stunting in pre-school children. Several  
105 studies have observed a positive effect of breastfeeding on child growth (25-27). Household

wealth index also has a strong positive effect on child growth (28-30). Children in better-off households tend to have better growth outcomes relative to those in poor households.

The literature reviewed above focus almost exclusively on child growth deficiencies (undernutrition/abnormal growth) and the factors associated with the same. Statistical analyses that simultaneously examine the positive as well as negative determinants of normal child growth are, to the best of our knowledge, still missing. Protective factors against child growth deficiencies may not necessarily be positive determinants of normal growth, it is significant to conduct analysis, using normal growth as the key outcome to elucidate the direct relationship between socio-demographic determinants and positive linear growth among children. It is widely recognized that children in better-off households tend to have better growth and health outcomes. However, stratified analysis to understand the key covariates responsible for the positive growth outcomes in this sub-group is lacking. This study intended to fill this gap by stratifying the analysis by better-off households, focusing on children who are growing normally (rather than those that are not) and the factors that make them to grow well. We also investigated the factors that poses a potential risk (negative determinants) to child growth in better-off households. This will further our understanding of the key positive and negative determinants of normal child growth. The objective of this study therefore is to examine the positive and negative determinants of normal child growth in better-off households.

# **Methodology**

## *Data sources and sampling strategy*

This analysis used data from the Demographic and Health Surveys (DHS) (31), conducted in Ghana (2014), Kenya (2014), Nigeria (2013), Mozambique (2011) and Democratic Republic of Congo (DRC) (2013-2014). The selection of these five countries was informed by our previous work (12, 32). The DHS data are nationally representative, repeated cross-sectional household surveys collected primarily in LIMCs every 5 years using standardised questionnaires to enable cross-country comparisons (33, 34). The DHS utilises a two-stage sample design (35-39). The first stage involves the selection of sample points or clusters from an updated master sampling frame constructed from National Population and Housing Census of the respective countries. The clusters are selected using systematic sampling with probability proportional to size. Household listing is then conducted in all the selected clusters to provide a sampling frame for the second stage selection of households. The second stage selection involves the systematic sampling of the households listed in each cluster, and households to be included in the survey are randomly selected from the list. The rationale for the second stage selection is to ensure adequate numbers of completed individual interviews to provide estimates for key indicators with an acceptable precision. All men and women aged 15-59 and 15-49 respectively, in the selected households (men in half of the households) are eligible to participate in the surveys if they were either usual residents of the household or visitors present in the household on the night before the survey.

## *Study participants*

Our study population comprised children aged 0–59 months, born to mothers aged 15–49 years living in better-off households. Information on children was obtained through face-to-face interviews with mothers. Height was measured with an adjustable measuring board calibrated in millimetres. Children younger than 24 months were measured lying down (recumbent length) on the board, while standing height was measured for older children. The height data were converted into Z-scores based on the 2006 WHO growth standards (40). The total samples used in the current analysis were: Ghana, n= 1,247; Nigeria, n= 12,999; Kenya, n= 3,895; Mozambique, n= 5,711; and DRC, n= 3,943.

## **Ethics statement**

The DHS obtained ethical clearance from Government recognised Ethical Review Committees/Institutional Review Boards of the respective countries as well as the Institutional Review Board of ICF International, USA, before the surveys were conducted. Written informed consent was obtained from the mothers of the children before participation. The authors of this paper sought and obtained permission from the DHS program for the use of the data. The data were completely anonymized and therefore the authors did not seek further ethical clearance before their use.



## Outcome and predictor variables

### *Outcome Variables*

The main indicator of child linear growth used in this analysis was child height-for-age Z-scores (HAZ). The HAZ scores were computed using the 2006 WHO growth standards (40) and classified into normal growth (or not stunted) and stunted (or poor growth). In this paper, children who have HAZ equal to or above -2 SD ( $HAZ \geq -2SD$ ) (40, 41) were described as having a normal growth, while children with HAZ below -2 SD ( $HAZ < -2$ ) from the median HAZ of the WHO reference population (40) were considered stunted (chronically malnourished).

### *Stratification variable*

We used the household wealth index (WI) as the stratification variable in our analysis. The WI has been used in many DHS reports to measure inequalities in household characteristics, in the use of health and other services, and in health outcomes (34, 35, 37, 42). It is an indicator of wealth that is consistent with expenditure and income measurement among households (33, 34, 37). The index in the DHS dataset was created based on assets ownership and housing characteristics of each household: type of roofing, and flooring material, source of drinking water, sanitation facilities, ownership of television, bicycle, motorcycle, automobile among others. Principal component analysis was employed to assign weights to each asset in each household. The asset scores were summed up and individuals ranked according to the household score. The WI was then divided into quintiles: poorest, poorer, middle, richer and richest (33, 34,

37). For the purpose of this analysis, we recoded middle, richer and richest households into “better-off households”. All the analyses were restricted to this sub-category.

# *Framework underpinning the analysis*

The UNICEF conceptual framework (43), which outlines the causes of undernutrition underpinned our empirical analysis. This is a socio-ecological framework encompassing factors at the individual, household and societal levels. In the UNICEF framework, child malnutrition can be analysed in terms of immediate, underlying and basic causes. The immediate causes are inadequate dietary intakes and infectious disease, the underlying causes are inadequate maternal and child care, inadequate health services and health environment and the basic causes are institutional and socio-economic determinants and potential resources (43). However, the present analysis was guided by the extended UNICEF conceptual framework for childcare, survival, growth and development (9, 43). The extended UNICEF framework suggests that child survival, growth and development are influenced by a web of factors, with three underlying determinants being food security, healthcare and a healthy environment, and care for children and women (9). These underlying determinants are in turn influenced by basic determinants. These basic determinants may be described as “exogenous” determinants, which influence child nutrition through their effect on the intervening proximate determinants (underlying determinants). In effect, the underlying factors are therefore, endogenously determined by the exogenous factors (44). In this analysis, we included only the basic factors (socio-demographic) in our empirical models. We did this because there is evidence that in examining the association

between child growth outcomes and exogenous factors, the proximate factors are usually excluded to prevent biased and uninterpretable parameters (44-46). Besides the basic factors, we also included antenatal care (ANC) and breastfeeding practices, which relies mostly on exogenous public health provisions rather than socio-demographic endowments of the household (44). The significance of including these two variables in the model is that changes in them are likely to be more responsive to policies, programmes and interventions rather than to changes in socio-demographic endowments of the household (44). For example, there is evidence that policy, institutional and contextual settings are key determinants of the prevalence of breastfeeding practices (44, 47).

## **Data analysis**

We built two empirical regression models for each of the five countries. In the first models, we included maternal body mass index (BMI), education, age, work status, parity, breastfeeding status, marital status, antenatal attendance, sex of household head, household size, number of children under five years and place of residence. We adjusted for child dietary diversity (DD)—the details of how the DD is created can be found elsewhere (12), age and sex in the second and final model. The selection of the explanatory variables was informed by the UNICEF conceptual framework of child care (9). We estimated adjusted odd ratios (aORs) of the positive and negative determinants of normal child growth in rich households.

## Results

### *Characteristics of study samples*

The results showed that Ghana (87%) had the highest number of children with normal growth followed by Kenya (80%), while in Mozambique, DRC and Nigeria, the prevalence ranged from 62% to 74%. Regarding dietary diversity intake, Mozambique had the highest prevalence of children who consumed at least four food groups (21%), with DRC (12%) having the lowest prevalence. Similarly, Mozambique had the highest number of women with normal weight (73%), followed by DRC (69%). The prevalence ranged from 43% to 59% in Ghana, Kenya and Nigeria. Ghana had the highest prevalence (59%) of women who had attained a secondary school education, while Mozambique had the lowest prevalence (21%). Higher education was less than 15% among women across all countries, with Mozambique (1.3%) registering the lowest prevalence. DRC had the highest prevalence (86%) ANC attendance among women followed by Ghana (72%), while Nigeria had the lowest prevalence (19%). Also, Mozambique (35%) had the highest number of women who were household heads, with Nigeria (14%) having the lowest women headed households (Table 1).

248 **Table 1: Characteristics of the study samples of the five countries**

| Variables                           | DRC  |      | Ghana |      | Kenya  |      | Mozambique |      | Nigeria |      |
|-------------------------------------|------|------|-------|------|--------|------|------------|------|---------|------|
| <b>Child-level covariates</b>       |      |      |       |      | %/mean | SD   | %/mean     | SD   | %/mean  | SD   |
| Height-for-age (HAZ $\geq$ -2)      | 62.0 |      | 87.0  |      | 80.0   |      | 66.0       |      | 74.2    |      |
| DD < 4 food groups                  | 87.6 |      | 87.0  |      | 80.2   |      | 78.6       |      | 86.9    |      |
| DD $\geq$ 4 food groups             | 12.4 |      | 14.0  |      | 19.8   |      | 21.4       |      | 13.1    |      |
| <b>Sex of child</b>                 |      |      |       |      |        |      |            |      |         |      |
| Female                              | 50.4 |      | 48.0  |      | 49     |      | 49.2       |      | 49.5    |      |
| Male                                | 49.6 |      | 52.0  |      | 51.0   |      | 50.8       |      | 50.5    |      |
| <b>Mother-level covariates</b>      |      |      |       |      |        |      |            |      |         |      |
| <b>Body Mass Index (BMI)</b>        |      |      |       |      |        |      |            |      |         |      |
| BMI <18.50                          | 9.4  |      | 2.9   |      | 5.34   |      | 4.11       |      | 5.42    |      |
| BMI = 18.50-24.99                   | 69.2 |      | 43.0  |      | 55.1   |      | 73.9       |      | 58.7    |      |
| BMI = 25-29.99                      | 16.3 |      | 32.0  |      | 27.0   |      | 17.2       |      | 24.6    |      |
| BMI $\geq$ 30                       | 3.9  |      | 22.0  |      | 12.6   |      | 4.54       |      | 10.9    |      |
| <b>Education</b>                    |      |      |       |      |        |      |            |      |         |      |
| No education                        | 12.6 |      | 15.0  |      | 6.0    |      | 24.5       |      | 20.6    |      |
| Primary education                   | 38.7 |      | 18.0  |      | 50.8   |      | 53.4       |      | 24.3    |      |
| Secondary education                 | 46.8 |      | 59.0  |      | 30.5   |      | 20.8       |      | 43.6    |      |
| Higher education                    | 1.8  |      | 7.5   |      | 12.6   |      | 1.26       |      | 11.5    |      |
| <b>Working status</b>               |      |      |       |      |        |      |            |      |         |      |
| Not working                         | 27.2 |      | 25.0  |      | 36.4   |      | 63.3       |      | 25.3    |      |
| IS working                          | 72.5 |      | 74.0  |      | 63.4   |      | 36.7       |      | 74.3    |      |
| Parity                              | 4.37 | 2.58 | 2.99  | 1.69 | 3.127  | 2.05 | 3.51       | 2.12 | 3.90    | 2.32 |
| Is Breastfeeding                    | 67.8 |      | 53.0  |      | 51.3   |      | 55.8       |      | 51.5    |      |
| <b>Marital status</b>               |      |      |       |      |        |      |            |      |         |      |
| Not in union                        | 13.3 |      | 13.0  |      | 14.7   |      | 17.3       |      | 5.1     |      |
| Married                             | 67.1 |      | 65.0  |      | 79.6   |      | 45.0       |      | 90.5    |      |
| Cohabiting                          | 19.7 |      | 22.0  |      | 5.62   |      | 37.6       |      | 4.4     |      |
| Number of antenatal visits $\geq$ 4 | 86.3 |      | 72.0  |      | 50.8   |      | 45.1       |      | 48.2    |      |

**Household-level covariates*****Sex of household head***

|                            |      |      |      |      |      |      |      |      |      |      |
|----------------------------|------|------|------|------|------|------|------|------|------|------|
| Household head is Female   | 19.7 |      | 29.0 |      | 29.6 |      | 34.5 |      | 13.9 |      |
| Household head is Male     | 80.3 |      | 71.0 |      | 70.4 |      | 65.5 |      | 86.1 |      |
| Household size             | 7.30 | 2.99 | 5.0  | 1.93 | 5.57 | 2.31 | 6.49 | 2.89 | 6.73 | 3.56 |
| Number of children under 5 | 2.28 |      | 1.6  | 0.69 | 1.64 | 0.76 | 1.92 | 0.94 | 2.14 | 1.11 |

**Community-level covariates**

|                 |      |  |      |  |      |  |      |  |      |  |
|-----------------|------|--|------|--|------|--|------|--|------|--|
| Urban residence | 49.2 |  | 73.0 |  | 52.3 |  | 45.2 |  | 55.1 |  |
|-----------------|------|--|------|--|------|--|------|--|------|--|

249 DD=Dietary diversity; DRC=Democratic Republic of Congo; SD=Standard deviat

## *Multivariable results of the factors promoting or inhibiting normal child growth*

The results of the multivariable analysis of the positive and negative determinants of normal growth among children under 5 years in better-off households are presented in Tables 2-6. The results are presented as adjusted odd ratios (aORs).

## *Positive determinants of normal child growth*

The results showed that maternal normal weight (measured by BMI) was associated with increased odds of normal linear growth among children in Mozambique (aOR=1.82, 95% CI=1.33, 2.50), while overweight associated with increased odds of normal linear growth in DRC (aOR=1.75, 95% CI=1.17,2.62), Kenya (aOR=2.01, 95% CI= 1.28, 3.16), Mozambique (aOR=2.19, 95% CI= 1.53, 3.14) and Nigeria (aOR=1.44, 95% CI=1.16,1.77) relative to children of underweight mothers. Maternal obesity had similar effect on normal linear growth in Kenya, Mozambique and Nigeria. One year increase in maternal years of education was associated with increased odds of normal linear growth among children in DRC (aOR=1.06, 95% CI=1.03, 1.09), Ghana (aOR=1.08, 95% CI=1.04, 1.12), Mozambique (aOR=1.08, 95% CI=1.05, 1.11) and Nigeria (aOR=1.07, 95% CI=1.06, 1.08). The results in Kenya did not reach statistical significance. An additional year in maternal age was associated with increased odds of normal linear growth among children in all the countries included in the analysis. Breastfeeding was associated with increased odds of normal linear growth in Nigeria (aOR= 1.30, 95% CI=1.16, 1.46) and Kenya (aOR=1.37, 95% CI=1.05, 1.79). In Ghana, Mozambique and DRC, breastfeeding was positively associated with normal linear growth in the first model but this statistical significant association disappeared

after the child level covariates such as age, sex and dietary diversity were included in the final empirical model. Urban place of residence was associated with increased odds of normal linear growth among children in DRC (aOR=1.32, 95% CI=1.06, 1.65) and Mozambique (aOR=1.18, 95% CI=1.01, 1.38). The association did not reach statistical significance in the remaining three countries.

### *Negative determinants normal child growth*

This section examines the negative determinants of normal linear growth. The results showed that children of mothers who were working had 25% (aOR=0.75, 95% CI=0.60, 0.93) reduced odds of normal linear growth in DRC. A unit change in maternal parity was associated with 10% (aOR=0.90, 95% CI=0.84, 0.97), 23% (aOR=0.77, 95% CI=0.63, 0.93), 25% (aOR=0.75, 95% CI=0.69, 0.82), 6% (aOR=0.94, 95% CI=0.89, 0.99) and 5% (aOR=0.95, 95% CI=0.92, 0.99) reduced odds of normal linear growth among children in DRC, Ghana, Kenya, Mozambique and Nigeria respectively. Similarly, a unit change in child's age was associated with reduced odds of normal linear growth in DRC, Mozambique and Nigeria. Further, a child being a male was associated with 16% (aOR=0.82, 95% CI=0.68, 0.98), 40% (aOR=0.60, 95% CI=0.40, 0.89), 37% (aOR=0.63, 95% CI=0.51, 0.77) and 21% (aOR=0.79, 95% CI=0.71, 0.87) reduced odds of normal linear growth among children in DRC, Ghana, Kenya and Nigeria respectively. The association in Mozambique did not reach statistical significance.



**Table 2: Adjusted odd ratios (aOR) of positive and negative determinants of normal linear growth among children living in better-off households, DRC**

| Variables                                | Model 1                     | Model 2                     |
|------------------------------------------|-----------------------------|-----------------------------|
| <b>Mother-level covariates</b>           |                             |                             |
| BMI (kg/m <sup>2</sup> ) = 18.50 - 24.99 | 1.093<br>(0.782 - 1.526)    | 1.124<br>(0.796 - 1.589)    |
| BMI (kg/m <sup>2</sup> ) = 25 - 29.99    | 1.685***<br>(1.138 - 2.493) | 1.751***<br>(1.172 - 2.617) |
| BMI (kg/m <sup>2</sup> ) >= 30           | 1.573<br>(0.855 - 2.892)    | 1.729<br>(0.884 - 3.382)    |
| Maternal education (in single years)     | 1.061***<br>(1.032 - 1.090) | 1.060***<br>(1.030 - 1.091) |
| Age of the mother (in years)             | 1.039***<br>(1.015 - 1.063) | 1.051***<br>(1.026 - 1.077) |
| Working status = Is working              | 0.741***<br>(0.597 - 0.920) | 0.747**<br>(0.597 - 0.934)  |
| Parity                                   | 0.902***<br>(0.844 - 0.965) | 0.899***<br>(0.838 - 0.965) |
| Is Breastfeeding = YES                   | 1.678***<br>(1.370 - 2.055) | 1.184<br>(0.943 - 1.487)    |
| Marital Status = Married                 | 1.034<br>(0.756 - 1.415)    | 1.076<br>(0.786 - 1.473)    |
| Marital Status = Cohabiting              | 0.976<br>(0.687 - 1.389)    | 0.994<br>(0.697 - 1.418)    |
| Number of antenatal visits = 4+ visits   | 1.589***<br>(1.296 - 1.947) | 1.159<br>(0.923 - 1.457)    |
| <b>Household-level covariates</b>        |                             |                             |
| Head of HH is Male                       | 0.865<br>(0.681 - 1.098)    | 0.868<br>(0.678 - 1.111)    |
| Household size                           | 1.007<br>(0.968 - 1.048)    | 1.002<br>(0.962 - 1.043)    |
| Number of children under 5 years         | 0.945<br>(0.844 - 1.059)    | 0.954<br>(0.850 - 1.071)    |
| <b>Community-level covariates</b>        |                             |                             |
| Urban residence = Urban                  | 1.322**<br>(1.066 - 1.640)  | 1.320**<br>(1.059 - 1.646)  |
| <b>Child-level covariates</b>            |                             |                             |
| Dietary Diversity (DD) >= 4              |                             | 1.294*<br>(0.971 - 1.724)   |
| Age of the child (in months)             |                             | 0.975***<br>(0.969 - 0.982) |
| Sex of child = Male                      |                             | 0.815**<br>(0.677 - 0.982)  |
| <b>Observations</b>                      | <b>3,943</b>                | <b>3,943</b>                |

95% Confidence Intervals (CIs) in parentheses; DD-Dietary diversity; HH-Household; BMI-Body mass index  
\*\*\* p<0.01, \*\* p<0.05, \* p<0.1

**Table 3: Adjusted odd ratios (aOR) of positive and negative determinants of normal linear growth among children living in better-off households, Ghana**

| Variables                                | Model 1                     | Model 2                     |
|------------------------------------------|-----------------------------|-----------------------------|
| <b>Mother-level covariates</b>           |                             |                             |
| BMI (kg/m <sup>2</sup> ) = 18.50 - 24.99 | 0.692<br>(0.224 - 2.136)    | 0.725<br>(0.241 - 2.181)    |
| BMI (kg/m <sup>2</sup> ) = 25 - 29.99    | 1.230<br>(0.385 - 3.929)    | 1.270<br>(0.410 - 3.931)    |
| BMI (kg/m <sup>2</sup> ) >= 30           | 1.617<br>(0.478 - 5.469)    | 1.700<br>(0.514 - 5.628)    |
| Maternal education (in single years)     | 1.078***<br>(1.037 - 1.121) | 1.081***<br>(1.039 - 1.124) |
| Age of the mother (in years)             | 1.047*<br>(0.998 - 1.099)   | 1.052**<br>(1.001 - 1.105)  |
| Working status = Is working              | 1.276<br>(0.821 - 1.983)    | 1.264<br>(0.804 - 1.987)    |
| Parity                                   | 0.779**<br>(0.643 - 0.944)  | 0.766***<br>(0.630 - 0.932) |
| Is Breastfeeding = YES                   | 1.769**<br>(1.129 - 2.771)  | 1.748*<br>(0.981 - 3.116)   |
| Marital Status = Married                 | 1.956**<br>(1.032 - 3.708)  | 2.104**<br>(1.101 - 4.022)  |
| Marital Status = Cohabiting              | 1.524<br>(0.783 - 2.967)    | 1.659<br>(0.849 - 3.240)    |
| Number of antenatal visits = 4+ visits   | 1.124<br>(0.695 - 1.817)    | 1.110<br>(0.646 - 1.906)    |
| <b>Household-level covariates</b>        |                             |                             |
| Head of HH is Male                       | 1.250<br>(0.783 - 1.996)    | 1.200<br>(0.753 - 1.911)    |
| Household size                           | 0.998<br>(0.894 - 1.114)    | 0.998<br>(0.891 - 1.117)    |
| Number of children under 5               | 0.834<br>(0.555 - 1.253)    | 0.843<br>(0.559 - 1.274)    |
| <b>Community-level covariate</b>         |                             |                             |
| Urban residence = Urban                  | 1.020<br>(0.640 - 1.628)    | 0.988<br>(0.623 - 1.565)    |
| <b>Child-level covariates</b>            |                             |                             |
| Dietary Diversity (DD) >= 4              |                             | 1.022<br>(0.590 - 1.770)    |
| Age of the child (in months)             |                             | 0.998<br>(0.982 - 1.014)    |
| Sex of child = Male                      |                             | 0.596**<br>(0.400 - 0.887)  |
| <b>Observations</b>                      | <b>1,247</b>                | <b>1,247</b>                |

95% Confidence Intervals (CIs) in parentheses; DD-Dietary diversity; HH-Household; BMI-Body mass index  
 \*\*\* p<0.01, \*\* p<0.05, \* p<0.1

**Table 4: Adjusted odd ratios (aOR) of positive and negative determinants of normal linear growth among children living in better-off households, Kenya**

| Variables                                | Model 1                     | Model 2                     |
|------------------------------------------|-----------------------------|-----------------------------|
| <b>Mother-level covariates</b>           |                             |                             |
| BMI (kg/m <sup>2</sup> ) = 18.50 - 24.99 | 1.245<br>(0.824 - 1.881)    | 1.313<br>(0.872 - 1.976)    |
| BMI (kg/m <sup>2</sup> ) = 25 - 29.99    | 1.880***<br>(1.195 - 2.960) | 2.014***<br>(1.284 - 3.158) |
| BMI (kg/m <sup>2</sup> ) >= 30           | 1.860**<br>(1.082 - 3.195)  | 1.991**<br>(1.165 - 3.402)  |
| Maternal education (in single years)     | 1.017<br>(0.984 - 1.051)    | 1.021<br>(0.987 - 1.055)    |
| Age of the mother (in years)             | 1.074***<br>(1.046 - 1.102) | 1.075***<br>(1.046 - 1.104) |
| Working status = Is working              | 0.969<br>(0.775 - 1.211)    | 0.982<br>(0.786 - 1.227)    |
| Parity                                   | 0.752***<br>(0.688 - 0.823) | 0.752***<br>(0.687 - 0.822) |
| Is Breastfeeding = YES                   | 1.373***<br>(1.103 - 1.710) | 1.367**<br>(1.047 - 1.785)  |
| Marital Status = Married                 | 1.131<br>(0.826 - 1.547)    | 1.112<br>(0.810 - 1.526)    |
| Marital Status = Cohabiting              | 1.278<br>(0.785 - 2.079)    | 1.233<br>(0.756 - 2.009)    |
| Number of antenatal visits = 4+ visits   | 1.132<br>(0.906 - 1.415)    | 1.095<br>(0.862 - 1.390)    |
| <b>Household-level covariates</b>        |                             |                             |
| Head of HH is Male                       | 0.986<br>(0.781 - 1.245)    | 0.987<br>(0.780 - 1.248)    |
| Household size                           | 1.054*<br>(0.991 - 1.122)   | 1.047<br>(0.984 - 1.114)    |
| Number of children under 5               | 1.018<br>(0.871 - 1.189)    | 1.026<br>(0.878 - 1.200)    |
| <b>Community-level covariate</b>         |                             |                             |
| Urban residence = Urban                  | 0.883<br>(0.719 - 1.085)    | 0.890<br>(0.723 - 1.096)    |
| <b>Child-level covariates</b>            |                             |                             |
| Dietary Diversity (DD) >= 4              |                             | 0.784*<br>(0.597 - 1.030)   |
| Age of the child (in months)             |                             | 0.996<br>(0.989 - 1.003)    |
| Sex of child = Male                      |                             | 0.625***<br>(0.507 - 0.770) |
| <b>Observations</b>                      | <b>3,985</b>                | <b>3,985</b>                |

95% Confidence Intervals (CIs) in parentheses; DD-Dietary diversity; HH-Household; BMI-Body mass index

\*\*\* p<0.01, \*\* p<0.05, \* p<0.1

**Table 5: Adjusted odd ratios (aOR) of positive and negative determinants of normal linear growth among children living in better-off households, Mozambique**

| Variables                                | Model 1                     | Model 2                     |
|------------------------------------------|-----------------------------|-----------------------------|
| <b>Mother-level covariates</b>           |                             |                             |
| BMI (kg/m <sup>2</sup> ) = 18.50 - 24.99 | 1.780***<br>(1.303 - 2.430) | 1.823***<br>(1.329 - 2.500) |
| BMI (kg/m <sup>2</sup> ) = 25.00 - 29.99 | 2.144***<br>(1.502 - 3.060) | 2.190***<br>(1.528 - 3.137) |
| BMI (kg/m <sup>2</sup> ) >= 30           | 4.106***<br>(2.453 - 6.870) | 4.268***<br>(2.537 - 7.179) |
| Maternal education (in single years)     | 1.077***<br>(1.052 - 1.102) | 1.079***<br>(1.054 - 1.105) |
| Age of the mother (in years)             | 1.035***<br>(1.018 - 1.052) | 1.039***<br>(1.022 - 1.056) |
| Working status = Is working              | 0.941<br>(0.813 - 1.088)    | 0.950<br>(0.821 - 1.098)    |
| Parity                                   | 0.943**<br>(0.894 - 0.995)  | 0.942**<br>(0.892 - 0.994)  |
| Is Breastfeeding = YES                   | 1.240***<br>(1.068 - 1.439) | 1.070<br>(0.906 - 1.263)    |
| Marital Status = Married                 | 0.977<br>(0.787 - 1.213)    | 1.009<br>(0.811 - 1.255)    |
| Marital Status = Cohabiting              | 1.278**<br>(1.035 - 1.578)  | 1.289**<br>(1.043 - 1.593)  |
| Number of antenatal visits = 4+ visits   | 1.055<br>(0.911 - 1.222)    | 0.942<br>(0.807 - 1.100)    |
| <b>Household-level covariates</b>        |                             |                             |
| Head of HH is Male                       | 0.874*<br>(0.746 - 1.024)   | 0.887<br>(0.757 - 1.039)    |
| Household size                           | 1.018<br>(0.988 - 1.048)    | 1.016<br>(0.986 - 1.046)    |
| Number of children under 5               | 0.998<br>(0.908 - 1.098)    | 1.009<br>(0.916 - 1.111)    |
| <b>Community-level covariate</b>         |                             |                             |
| Urban residence = Urban                  | 1.185**<br>(1.014 - 1.385)  | 1.181**<br>(1.010 - 1.381)  |
| <b>Child-level covariates</b>            |                             |                             |
| Dietary Diversity (DD) >= 4              |                             | 0.888<br>(0.752 - 1.048)    |
| Age of the child (in months)             |                             | 0.991***<br>(0.986 - 0.995) |
| Sex of child = Male                      |                             | 0.931<br>(0.811 - 1.069)    |
| <b>Observations</b>                      | <b>5,711</b>                | <b>5,711</b>                |

95% Confidence Intervals (CIs) in parentheses; DD-Dietary diversity; HH-Household; BMI-Body mass index

\*\*\* p<0.01, \*\* p<0.05, \* p<0.1

**Table 6: Adjusted odd ratios (aOR) of positive and negative determinants of normal linear growth among children living in better-off households, Nigeria**

| Variables                                | Model 1                     | Model 2                     |
|------------------------------------------|-----------------------------|-----------------------------|
| <b>Mother-level covariates</b>           |                             |                             |
| BMI (kg/m <sup>2</sup> ) = 18.50 - 24.99 | 1.135<br>(0.934 - 1.379)    | 1.129<br>(0.931 - 1.371)    |
| BMI (kg/m <sup>2</sup> ) = 25.00 - 29.99 | 1.434***<br>(1.157 - 1.777) | 1.435***<br>(1.159 - 1.777) |
| BMI (kg/m <sup>2</sup> ) ≥ 30            | 1.697***<br>(1.309 - 2.200) | 1.706***<br>(1.316 - 2.211) |
| Maternal education (in single years)     | 1.067***<br>(1.056 - 1.079) | 1.068***<br>(1.057 - 1.080) |
| Age of the mother (in years)             | 1.033***<br>(1.021 - 1.045) | 1.039***<br>(1.027 - 1.051) |
| Working status = Is working              | 1.072<br>(0.958 - 1.199)    | 1.106*<br>(0.988 - 1.238)   |
| Parity                                   | 0.957***<br>(0.925 - 0.989) | 0.954***<br>(0.922 - 0.986) |
| Is Breastfeeding = Yes                   | 1.537***<br>(1.388 - 1.703) | 1.303***<br>(1.162 - 1.461) |
| Marital Status = Married                 | 0.806*<br>(0.625 - 1.039)   | 0.803*<br>(0.622 - 1.037)   |
| Marital Status = Cohabiting              | 0.866<br>(0.606 - 1.237)    | 0.846<br>(0.592 - 1.209)    |
| Number of antenatal visits = 4+ visits   | 1.080<br>(0.975 - 1.197)    | 0.877**<br>(0.776 - 0.990)  |
| <b>Household-level covariates</b>        |                             |                             |
| Head of HH is Male                       | 0.850**<br>(0.728 - 0.992)  | 0.856*<br>(0.733 - 1.000)   |
| Household size                           | 0.980**<br>(0.963 - 0.998)  | 0.980**<br>(0.962 - 0.998)  |
| Number of children under 5               | 0.946*<br>(0.893 - 1.002)   | 0.941**<br>(0.888 - 0.997)  |
| <b>Community-level covariate</b>         |                             |                             |
| Urban residence = Urban                  | 1.004<br>(0.910 - 1.108)    | 1.013<br>(0.917 - 1.118)    |
| <b>Child-level covariates</b>            |                             |                             |
| Dietary Diversity (DD) ≥ 4               |                             | 1.055<br>(0.904 - 1.231)    |
| Age of the child (in months)             |                             | 0.988***<br>(0.984 - 0.991) |
| Sex of child = Male                      |                             | 0.785***<br>(0.712 - 0.865) |
| <b>Observations</b>                      | <b>12,999</b>               | <b>12,999</b>               |

95% Confidence Intervals (CIs) in parentheses; DD-Dietary diversity; HH-Household; BMI-Body mass index  
\*\*\* p<0.01, \*\* p<0.05, \* p<0.1

## Discussion

This study investigated the positive and negative determinants of normal linear growth among children living in better-off households in DRC, Ghana, Kenya, Mozambique and Nigeria. The results shed new insights on both positive and negative determinants of child growth, and country-specific variations of these effects in the five countries. In the current analysis, higher maternal weight (measured by BMI) tends to have significant positive effect on normal growth among children living in better-off households in all countries except Ghana. Thus, maternal weight is a key determinant of positive child growth outcomes. Despite the fact that higher maternal weight has positive effect on child normal growth, interventions should target at increasing maternal weight qualitatively for the benefit of both the mother and child. This is critical because of the negative effect of unhealthy weight on maternal health outcomes (48-50). These findings are in line with the literature. Maternal nutrition was found to have a significant positive effect on child linear growth in many settings (10-12). In India, BMI among other variables, was found to have significantly effect on child linear growth (11). The preceding discussion illuminated the crucial role maternal nutrition plays in improving child nutritional status, even though the pathways through which this happens may be complex.

The importance role maternal education plays in promoting positive child health outcomes was observed in the present study. Our results showed that maternal years of education have

significant positive effects on normal linear growth in all the five countries except Kenya. This suggests that education has the potential to promote normal growth of children living in better-off households. Interventions to promote child growth may have positive impact of normal linear growth of children living in these households. The beneficial effects of maternal years of education on child growth has previously been documented. An improvement in maternal education was associated positively with dramatic change in linear growth among pre-school children (10, 11). This may be the case because educated mothers tend to utilize both preventive and curative health care more (51, 52). Educated mothers also tend to have more strongly committed attitude towards good childcare than uneducated mothers (53, 54). Furthermore, the more education the mother has the more the likelihood that she is sensitive and responsive to caregiving duties (53, 54). Also, there is evidence that children seemingly engage more positively with their mothers when maternal education is greater (54). All the above have positive effects on child growth outcomes. The literature discussed above together with our study clearly demonstrated the importance of maternal education for positive child health outcomes.

The health benefits of breastfeeding were illuminated in this study but only in two countries. Breastfeeding was found to associate with the likelihood of normal linear growth among children living in better-off households in Kenya and Nigeria. This suggests that mothers in these households should be encouraged to practice breastfeeding because of its beneficial effects on their children growth. These findings confirm the widely recognised benefits of breastfeeding for improved health and developmental outcomes (25-27). In the contrary, breastfeeding showed a significant positive effect on child normal linear growth in the models containing only

the socio-demographic factors in Ghana, Mozambique and DRC. This significant association disappeared after child level covariates such as dietary diversity, age and sex were included in the final empirical models. This suggests that whether breastfeeding will have positive effect on normal child growth in better-off households or not is conditional on the inclusion or otherwise of child level co-variables. This corroborates previous research, which suggests that child level factors must be considered when evaluating the association of breastfeeding with anthropometric outcomes (55). The non-significant positive effect of breastfeeding on child growth has previously been documented (55-57). Thus, while breastfeeding is critical for positive child health outcomes, it is not always the case that its effects would be statistically significant.

Our analysis also illuminated negative determinants of normal linear growth. Maternal work status is inversely related to normal child growth in DRC. This implies that DRC mothers who are engaged in any form of work tend to have children who have poor linear growth relative to mothers who are not working. This negative effect may boil down to inadequate childcare due to limited time available to working mothers. A study in India concluded that a mother's employment compromises infant feeding and care, particularly so when mothers are not able to get alternative caregivers (58). This study further reported that the compromises related to childcare and feeding outweigh the benefits from employment (58). Other studies have shown that mothers working away from home spend less time with their children compared to mothers who are not working outside the home and therefore likely to have children who are undernourished (59, 60). Although, it is a well-documented fact that women who are working tend to have access to disposal income and therefore able to provide nutritious food as well as



other care services to their children (13, 17, 61, 62), the above discussion showed that maternal employment, indeed, could have negative effect on child growth outcomes. It is worthy to note that this analysis did not investigate the categories of employment and their effect on child growth. We are therefore unable to tell the independent effect of the various occupational groups on child linear growth. This is a limitation worth noting, as different occupations may have different effects.

Another negative growth determinant is maternal parity (number of pregnancies reaching viable gestational age). The results show that higher maternal parity has negative effect on normal linear growth among children living in better-off households. The effect is largest in Kenya (25%) followed by Ghana (23%), with the least effect being in Nigeria (5%). This suggests that higher parity has a stronger negative effect on child normal growth in Kenya and Ghana relative to the other countries. The negative effects of parity on child growth may be attributed to it being an important factor that affect maternal depletion, particular so among high fertility mothers (63, 64), which has the potential to compromise the mothers ability to provide good care for their children. The consequential effect of lack of good care is poor child growth. Secondly, women with higher parity are likely to have many young children, who might compete for the available care resources, which can have a negative effect on good care practices and consequently their children growth outcomes. Previous studies have documented that the higher the maternal parity, the less likelihood that their children will have positive growth outcomes (21, 22). For example, children from multiparous mothers were found to have lower rates of accelerated infant growth and lower levels of childhood body mass index than children of nulliparous mothers

(22). The preceding discussion clearly demonstrated that parity is a key negative determinant of child linear growth.

Similarly, two child biological factors (sex and age) were found to associate negatively with normal linear growth. A year increase in child's age was associated negatively with normal linear growth in three (DRC, Mozambique and Nigeria) of the five countries. This suggests that older children living in better-off households have a less likelihood of achieving a normal linear growth. These findings are consistent with previous research. Nshimyiryo and colleagues (65) observed that increasing age of the child had a significant association with poor linear growth. For instance, children aged 6–23 months were at lower risk of poor growth than those in the older age group 24–59 months (65). Also, being a male child affects the likelihood of children living in better-off households to have a normal linear growth. Previous work has shown that poor linear growth was higher among male children as compared to female children (66). Suggesting that male children tend to be more vulnerable to poor growth than their female counterparts in the same age group (67). This might be due to preferences in feeding practices or other types of exposures (67). It could also be explained by the fact that boys are expected to grow at a slightly more rapid rate compared to girls and their growth is perhaps more easily affected by nutritional deficiencies or other exposures (68).

## Strengths and limitations of the study

This study has some strengths. One important strength is the use of high quality large nationally representative DHS data to investigate the positive and negative determinants of normal linear growth among children living in rich households. This makes it possible for the findings to be generalized to the population of young children in the respective countries. The large data also help to produce more robust estimates of observed associations. The use of multi-country data unmask differences and highlights commonalities in the effects of the correlates on child growth across countries. This may not have been possible with single country data. Further, the height data used for computing the HAZ indicator were objectively measured, reducing possible misclassification. The novelty of this study is its focus on positive child growth outcomes rather than child growth deficiencies. A limitation worth mentioning is the cross-sectional nature of the data, which makes it difficult to disentangle potential reciprocal and otherwise complex causal relationships. The conclusions in this paper are therefore meant to be restricted to statements about the associations between the explanatory variables and the outcome variables.

## Conclusions

Maternal weight (BMI) tends to have significant positive effects on normal linear growth among children living in better-off households across all countries except Ghana. Interventions aimed at increasing maternal weight qualitatively are likely to be effective in improving the linear growth of children living in better-off households. Maternal years of education have significant positive

effects on normal linear growth in all the five countries except Kenya. This suggests that education has the potential to promote normal linear growth among of children living in better-off households. Breastfeeding was associated with the likelihood of normal linear growth in Kenya and Nigeria. This implies that mothers in better-off households should be encouraged to practice breastfeeding because of its beneficial effect on their children growth. Maternal work status is inversely related to normal growth in DRC. Thus, in DRC, mothers who are engaged in any form of work tend to have children with poor growth relative to mothers who are not working. The results show that higher maternal parity associate negatively with normal linear growth. The effect is largest in Kenya (25%) followed by Ghana (23%), with the least effect being in Nigeria (5%). In effect, higher parity has a stronger negative effect on child normal linear growth in Kenya and Ghana relative to the other countries.

## **Acknowledgements**

We wish to express our profound gratitude to The DHS Program, USA for providing us access to the data. We also wish to acknowledge institutions of respective countries that played critical roles in the data collection process.

## **Competing Interest**

The authors have no competing interests to declare.

## **Funding**

454 This study did not receive funding from any source.

## 455 **Data Sharing Statement**

456 This study was a re-analysis of existing data that are publicly available from The DHS Program at  
 457 <http://dhsprogram.com/publications/publication-fr221-dhs-final-reports.cfm>. Data are  
 458 accessible free of charge upon a registration with the Demographic and Health Survey program  
 459 (The DHS Program). The registration is done on the DHS website indicated above.

## 460 **Authors' Contribution**

461 DAA conceived and designed the study, interpreted the results, wrote the first draft of the  
 462 manuscript, and contributed to revision of the manuscript. DAA and ZTD analysed the data. ZTD  
 463 and EWK contributed to study design, data interpretation, and critical revision of the manuscript.  
 464 All authors take responsibility of any issues that might arise from the publication of this  
 465 manuscript.

# References

1. Kowalski AJ, Georgiadis A, Behrman JR, Crookston BT, Fernald LCH, Stein AD. Linear Growth through 12 Years is Weakly but Consistently Associated with Language and Math Achievement Scores at Age 12 Years in 4 Low- or Middle-Income Countries. *The Journal of nutrition*. 2018;148(11):1852-9.
2. Sudfeld CR, McCoy DC, Danaei G, Fink G, Ezzati M, Andrews KG, et al. Linear growth and child development in low- and middle-income countries: a meta-analysis. *Pediatrics*. 2015;135(5):e1266-75.
3. Prendergast AJ, Humphrey JH. The stunting syndrome in developing countries. *Paediatrics and International Child Health*. 2014;34(4):250-65.
4. WHO. Accelerating nutrition improvements in Sub-Saharan Africa: scaling up nutrition interventions: Final report 2012-2016. Geneva; 2017.
5. Lartey A. Maternal and child nutrition in Sub-Saharan Africa: challenges and interventions. *The Proceedings of the Nutrition Society*. 2008;67(1):105-8.
6. Hossain M, Choudhury N, Adib Binte Abdullah K, Mondal P, Jackson AA, Walson J, et al. Evidence-based approaches to childhood stunting in low and middle income countries: a systematic review. *Archives of Disease in Childhood*. 2017;102(10):903.
7. Akombi BJ, Agho KE, Merom D, Renzaho AM, Hall JJ. Child malnutrition in sub-Saharan Africa: A meta-analysis of demographic and health surveys (2006-2016). *PloS one*. 2017;12(5):e0177338-e.
8. Engle P. The role of caring practices and resources for care in child survival, growth, and developments: South and Southeast Asia *Asian Development Review*. 1999;17(1,2):132-67.
9. Engle PL, Menon P, Haddadb L. Care and nutrition: concepts and measurements. Washington, DC: UNICEF/International Food Policy Institute. 1997.
10. Uttamacharya U, Arokiasamy P, Verma R. Determinants of child Anthropometrics in India: A quantile regression analysis 2013 [Available from: <http://iussp.org/en/event/17/programme/paper/3785>.
11. Fenske N, Burns J, Hothorn T, Rehfuess EA. Understanding Child Stunting in India: A Comprehensive Analysis of Socio-Economic, Nutritional and Environmental Determinants Using Additive Quantile Regression *PloS one*. 2013;8(11).
12. Amugsi DA, Dimbuene ZT, Kimani-Murage EW, Mberu B, Ezech AC. Differential effects of dietary diversity and maternal characteristics on linear growth of children aged 6-59 months in sub-Saharan Africa: a multi-country analysis. *Public health nutrition*. 2017;20(6):1029-45.
13. Keino S, Plasqui G, Ettyang G, van den Borne B. Determinants of stunting and overweight among young children and adolescents in sub-Saharan Africa *Food Nutr Bull*. 2014;35(2):167-78.
14. Rachmi CN, Agho KE, Li M, Baur LA. Stunting, Underweight and Overweight in Children Aged 2.0-4.9 Years in Indonesia: Prevalence Trends and Associated Risk Factors *PloS one*. 2016;11(5):e0154756.
15. Felisbino-Mendes MS, Villamor E, Velasquez-Melendez G. Association of maternal and child nutritional status in Brazil: a population based cross-sectional study *PloS one*. 2014;9(1):e87486.
16. Subramanian SV, Ackerson LK, Davey Smith G, John NA. Association of Maternal Height With Child Mortality, Anthropometric Failure, and Anemia in India *JAMA*2009. 2009;301(16):1691-701.
17. Negash C, Whiting SJ, Henry CJ, Belachew T, Hailemariam TG. Association between Maternal and Child Nutritional Status in Hula, Rural Southern Ethiopia: Across Sectional Study *PloS one*. 2015;10(11):e0142301.
18. Sonkaria L, Zafer A, Gaur KL, Manohar RK. Maternal Factors Associated with Nutritional Status of 1-5 years Children Residing in Field Practice Area of Rural Health Training Centre Naila, Jaipur (Rajasthan) *India Natl J Community Med* 2014;5(3):283-7.

19. Finlay JE, Özaltin E, Canning D. The association of maternal age with infant mortality, child anthropometric failure, diarrhoea and anaemia for first births: evidence from 55 low- and middle-income countries *BMJ Open*. 2011;1(2).
20. Fall CH, Sachdev HS, Osmond C, Restrepo-Mendez MC, Victora C, Martorell R, et al. COHORTS investigators. Association between maternal age at childbirth and child and adult outcomes in the offspring: a prospective study in five low-income and middle-income countries (COHORTS collaboration) *Lancet Glob Health*. 2015;3(7):e366-77.
21. Amugsi DA, Mittelmark MB, Lartey A. Dietary Diversity is a Predictor of Acute Malnutrition in Rural but Not in Urban Settings: Evidence from Ghana *British Journal of Medicine and Medical Research*. 2014;4(25):4310–24.
22. Gaillard R, Rurangirwa Akashi A, Williams Michelle A, Hofman A, Mackenbach Johan P, Franco Oscar H, et al. Maternal Parity, Fetal and Childhood Growth, and Cardiometabolic Risk Factors. Hypertension. 2014;64(2):266-74.
23. Thuita FM, Mwadime RKN, Wang'ombe JK. Child nutritional status and maternal factors in an urban slum in Nairobi, Kenya *East African Medical Journal* 2005;82(4):209-15.
24. Kuhnt J, Vollmer S. Antenatal care services and its implications for vital and health outcomes of children: evidence from 193 surveys in 69 low-income and middle-income countries. *BMJ open*. 2017;7(11):e017122-e.
25. WHO. Continued breastfeeding for healthy growth and development of children 2019 [cited 2019 03.09]. Available from: [https://www.who.int/elena/titles/continued\\_breastfeeding/en/](https://www.who.int/elena/titles/continued_breastfeeding/en/).
26. Yan J, Liu L, Zhu Y, Huang G, Wang PP. The association between breastfeeding and childhood obesity: a meta-analysis. *BMC public health*. 2014;14:1267-.
27. Kramer MS, Aboud F, Mironova E, Vanilovich I, Platt RW, Matush L, et al. Breastfeeding and child cognitive development: new evidence from a large randomized trial. *Archives of general psychiatry*. 2008;65(5):578-84.
28. Hong R, Banta JE, Betancourt JA. Relationship between household wealth inequality and chronic childhood under-nutrition in Bangladesh. *International journal for equity in health*. 2006;5:15-.
29. Hong R, Mishra V. Effect of wealth inequality on chronic under-nutrition in Cambodian children. *Journal of health, population, and nutrition*. 2006;24(1):89-99.
30. Mostafa Kamal SM, Jr., Rosliza AM, Aynul M. Effects of Wealth on Nutritional Status of Pre-school Children in Bangladesh. *Malaysian journal of nutrition*. 2010;16(2):219-32.
31. The DHS Program. Demographic and Health Surveys [Available from: <http://dhsprogram.com/data/available-datasets.cfm>].
32. Amugsi DA, Dimbuene ZT, Kyobutungi C. Correlates of the double burden of malnutrition among women: an analysis of cross sectional survey data from sub-Saharan Africa. *BMJ Open*. 2019;9(7):e029545.
33. The DHS Program. Demographic and Health Surveys [cited 2018 06.09]. Available from: [https://dhsprogram.com/data/dataset\\_admin/download-datasets.cfm](https://dhsprogram.com/data/dataset_admin/download-datasets.cfm) [
34. The DHS Program. DHS Methodology [Available from: <http://dhsprogram.com/What-We-Do/Survey-Types/DHS-Methodology.cfm>].
35. Ghana Statistical Service (GSS), Ghana Health Service (GHS), ICF Macro. Ghana Demographic and Health Survey 2008 Accra, Ghana: GSS, GHS, and ICF Macro; 2009.
36. Ministry of Health and Social Services (MoHSS), Macro International Inc. Namibia Demographic and Health Survey 2006-07 Windhoek, Namibia and Calverton, Maryland, USA: MoHSS and Macro International Inc. ; 2008.
37. Ghana Statistical Service (GSS), Ghana Health Service (GHS), ICF International. Ghana Demographic and Health Survey 2014. Rockville, Maryland, USA: GSS, GHS, and ICF International.; 2015.

38. National Population Commission (NPC) [Nigeria], ICF International. Nigeria Demographic and Health Survey 2013. Abuja, Nigeria, and Rockville, Maryland, USA: NPC and ICF International. . 2014.
39. National Bureau of Statistics-Kenya, ICF International. 2014 KDHS Key Findings. Rockville, Maryland, USA: KNBS and ICF International. 2015.
40. WHO Multicentre Growth Reference Study Group. WHO Child Growth Standards based on length/height, weight and age Acta paediatrica (Oslo, Norway : 1992) Supplement. 2006;450:76-85.
41. Faye CM, Fonn S, Levin J, Kimani-Murage E. Analysing child linear growth trajectories among under-5 children in two Nairobi informal settlements. Public health nutrition. 2019;22(11):2001-11.
42. The Namibia Ministry of Health and Social Services (MoHSS) and ICF International, International. The Namibia Demographic and Health Survey 2013 Windhoek, Namibia, and Rockville, Maryland, USA: MoHSS and ICF. 2014.
43. UNICEF. The State of World's Children: Causes of Child Malnutrition 1998 [Available from: <https://www.unicef.org/sowc98/fig5.htm>.
44. Zanello G, Srinivasan CS, Shankar B. What Explains Cambodia's Success in Reducing Child Stunting-2000-2014? PloS one. 2016;11(9):e0162668.
45. Smith LC, Ruel MT, Ndiaye A. Why is child malnutrition lower in urban than in rural areas? Evidence from 36 developing countries World Devel. 2005;33(8):1285-305.
46. Sastry N. What explains rural-urban differentials in child mortality in Brazil? Social science & medicine (1982). 1997;44(7):989-1002.
47. Rollins NC, Bhandari N, Hajeebhoy N, Horton S, Lutter CK, Martines JC, et al. Why invest, and what it will take to improve breastfeeding practices? Lancet. 2016;387(10017):491-504.
48. Abrha S, Shiferaw S, Ahmed KY. Overweight and obesity and its socio-demographic correlates among urban Ethiopian women: evidence from the 2011 EDHS BMC Public Health. 2016;636.
49. Agyemang C, Owusu-Dabo E, de Jonge A, Martins D, Ogedegbe G, Stronks K. Overweight and obesity among Ghanaian residents in The Netherlands: how do they weigh against their urban and rural counterparts in Ghana? Public health nutrition2008.
50. Amugsi DA, Dimbuene ZT, Mberu B, Muthuri S, Ezeh AC. Prevalence and time trends in overweight and obesity among urban women: an analysis of demographic and health surveys data from 24 African countries, 1991–2014. BMJ Open. 2017;7(10):e017344.
51. Addai I. Determinants of use of maternal-child health services in rural Ghana. Journal of biosocial science. 2000;32(1):1-15.
52. Zegeye EA, Mbonigaba J, Dimbuene ZT. Factors associated with the utilization of antenatal care and prevention of mother-to-child HIV transmission services in Ethiopia: applying a count regression model. BMC women's health. 2018;18(1):187.
53. Richman AL, Miller PM, LeVine RA. Cultural and educational variations in maternal responsiveness. Developmental Psychology. 1992;28(4):614-21.
54. NICHD. Early Child Care Research Network. Child care and mother-child interaction in the first 3 years of life. NICHD Early Child Care Research Network Dev Psychol 1999;35(6):1399-413. .
55. Marquis GS, Habicht JP, Lanata CF, Black RE, Rasmussen KM. Association of breastfeeding and stunting in Peruvian toddlers: an example of reverse causality. International journal of epidemiology. 1997;26(2):349-56.
56. Amugsi DA, Mittelmark MB, Lartey A, Matanda DJ, Urke HB. Influence of childcare practices on nutritional status of Ghanaian children: a regression analysis of the Ghana Demographic and Health Surveys. BMJ Open. 2014;4.
57. Mulder-Sibanda M, Sibanda-Mulder FS. Prolonged breastfeeding in Bangladesh: indicators of inadequate feeding practices or mothers' response to children's poor health? Public Health. 1999;113(2):65-8.



58. Nair M, Ariana P, Webster P. Impact of mothers' employment on infant feeding and care: a qualitative study of the experiences of mothers employed through the Mahatma Gandhi National Rural Employment Guarantee Act. *BMJ Open*. 2014;4(4):e004434.
59. Abbi R, Christian P, Gujral S, Gopaldas T. The impact of maternal work on the nutrition and health status of children *Food and Nutrition Bulletin* 1991;13(1):20-4.
60. Popkin BM. Time allocation of the mother and child nutrition. *Ecology of Food and Nutrition* 1980;9:1-14.
61. Sharaf MF, Rashadb AS. Economic and Socio-Demographic Determinants of Child Nutritional Status in Egypt: A Comprehensive Analysis using Quantile Regression Approach. Working Paper No. 2016-04: University of Alberta 2016 [Available from: <http://www.ualberta.ca/~econwps/2016/wp2016-04.pdf>.
62. Abuya BA, Ciera J, Kimani-Murage E. Effect of mother's education on child's nutritional status in the slums of Nairobi *BMC Pediatr* 2012;12:80.
63. Zerihun T, Larson CP, Hanley JA. Anthropometric status of Oromo women of child bearing age in rural south-western Ethiopia *Ethiopian Journal of Health Development* 1997;11(3):1-7.
64. Teller H, Yimar G. Levels and determinants of malnutrition in adolescent and adult women in southern Ethiopia *Ethiopian Journal of Health Development* 2000;14(1):57-66.
65. Nshimiyiryo A, Hedt-Gauthier B, Mutaganzwa C, Kirk CM, Beck K, Ndayisaba A, et al. Risk factors for stunting among children under five years: a cross-sectional population-based study in Rwanda using the 2015 Demographic and Health Survey. *BMC Public Health*. 2019;19(1):175.
66. Mzumara B, Bwembya P, Halwiindi H, Mugode R, Banda J. Factors associated with stunting among children below five years of age in Zambia: evidence from the 2014 Zambia demographic and health survey. *BMC Nutrition*. 2018;4(1):51.
67. Wamani H, Astrom AN, Peterson S, Tumwine JK, Tylleskar T. Boys are more stunted than girls in sub-Saharan Africa: a meta-analysis of 16 demographic and health surveys. *BMC Pediatr*. 2007;7:17.
68. Condo JU, Gage A, Mock N, Rice J, Greiner T. Sex differences in nutritional status of HIV-exposed children in Rwanda: a longitudinal study. *Tropical medicine & international health : TM & IH*. 2015;20(1):17-23.
